# Supplementary material for: Longitudinal Analysis and Comparison of Six Serological Assays up to Eight Months Post-COVID-19 Diagnosis
Source: MDPI journal article supplement (doi:10.3390/jcm10091815), 2021-04-21
Supplement: s1 [file s1]

Supplementary Materials:

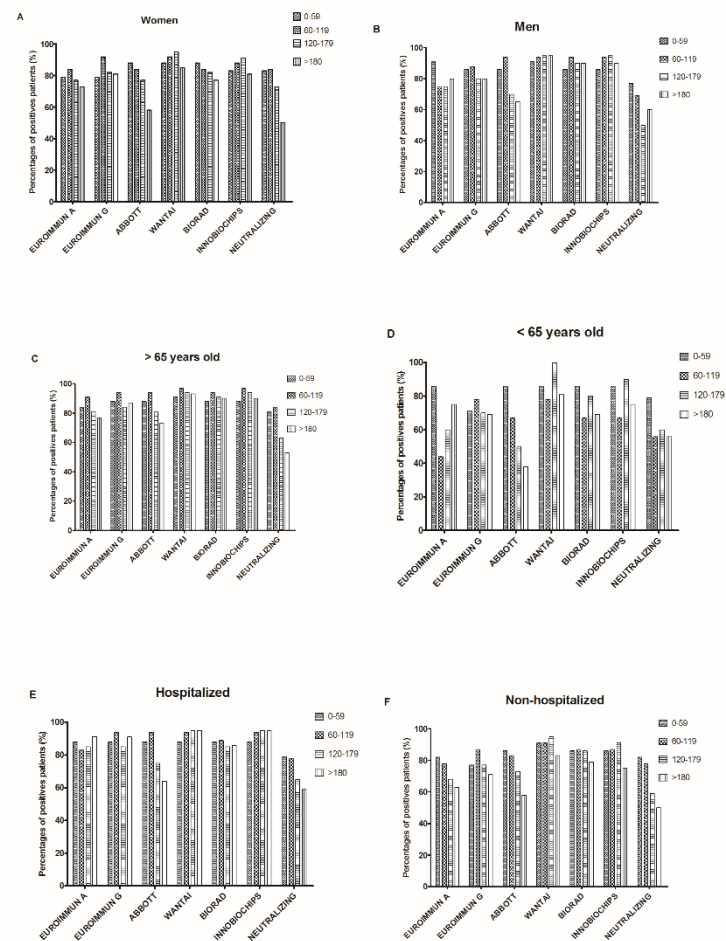

**Figure S1.** Percentage of SARS-CoV-2 positive patients in various serological assays by post-PCR period for women (A), men (B), people over 65 years of age (C), people under 65 years of age (D), people hospitalized for COVID-19 (E), and people not requiring hospitalization (F).

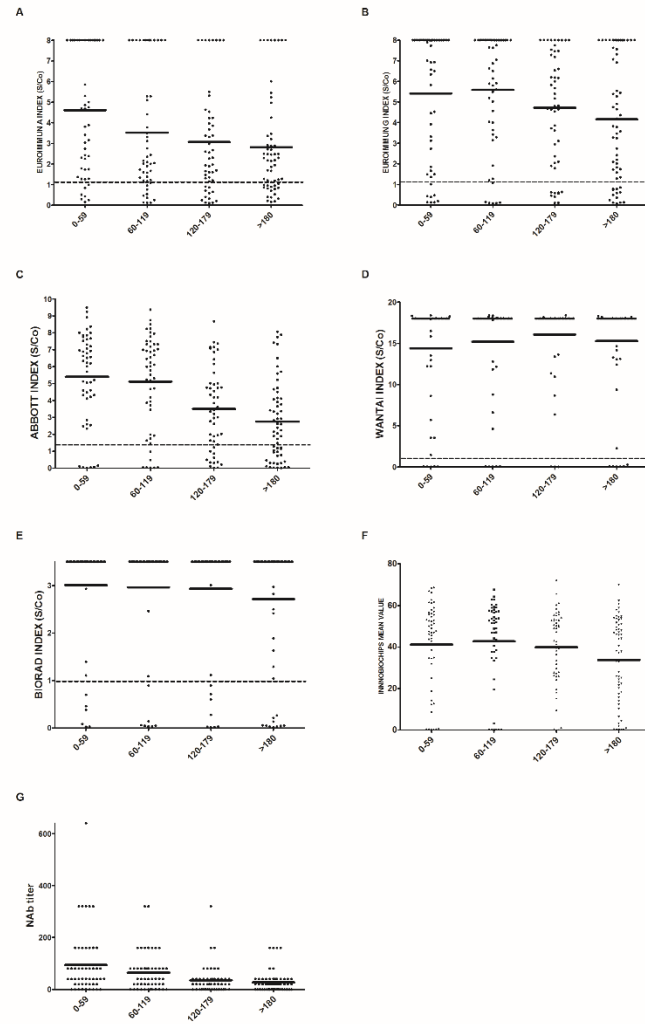

**Figure S2.** Raw data of the results of the 208 samples by assay according to the collection period after the first positive PCR.

**Table S1.** Characteristics of the serological assays.

|                                 | ABBOTT®                       | BIORAD®                          | EUROIMMUN®                     | WANTAI®                          | INNOBI-OCHIPS®                                                               | NEUTRALIZ-<br>ING ASSAY |
|---------------------------------|-------------------------------|----------------------------------|--------------------------------|----------------------------------|------------------------------------------------------------------------------|-------------------------|
| <b>Targeted viral antigen</b>   | Nucleocapsid                  | Nucleocapsid                     | Spike 1                        | Receptor-binding domain (RBD)    | Spike1, Spike 2, Nucleocapsid, Receptor-binding domain and N-terminal domain | Spike                   |
| <b>Immunoglobulins detected</b> | IgG                           | Total antibodies                 | IgA and IgG                    | Total antibodies                 | IgG                                                                          | Neutralizing antibodies |
| <b>Formats</b>                  | CLIA<br>Indirect antigen down | ELISA<br>Double antigen bridging | ELISA<br>Indirect antigen down | ELISA<br>Double antigen bridging | Multiplex ELISA                                                              | Pseudovirus assay       |
| <b>Positivity threshold</b>     | ≥ 1.4                         | ≥ 1                              | ≥ 1.1                          | ≥ 1                              | Algorithm according to arbitrary units for each antigen                      | Any titer > 10          |

CLIA : Chemiluminescence Immunoassay; ELISA : Enzyme-linked immunosorbent assay.
